# Supplementary material for: N1-Coordination in palladium(II) and platinum(II) complexes with 9-methylhypoxanthine: crystal structures and theoretical calculations
Source: Royal Society of Chemistry journal article supplement (doi:10.1039/b915427b), 2009-01-01
Supplement: b915427b.pdf [file b915427b.pdf]

## Electronic Supplementary Information (ESI)

# New Palladium(II) and Platinum(II) Complexes with the Model Nucleobase 9-Methylhypoxanthine: Crystal Structures and Theoretical Calculations.

José Ruiz,<sup>\*,†</sup> Natalia Cutillas,<sup>†</sup> María Dolores Villa,<sup>†</sup> Gregorio López,<sup>†</sup> Arturo  
Espinosa,<sup>††</sup> Delia Bautista<sup>‡</sup>

<sup>†</sup> *Departamento de Química Inorgánica, Facultad de Química, Universidad de Murcia,  
30071 Murcia, Spain. Fax: +34 868 384148; Tel: +34 868 887455; E-mail:  
[jruiz@um.es](mailto:jruiz@um.es)*

<sup>††</sup> *Departamento de Química Orgánica, Facultad de Química, Universidad de Murcia,  
30071 Murcia, Spain. Fax: +34 868884149; Tel: +34 868 887489; E-mail:  
[artuesp@um.es](mailto:artuesp@um.es)*

<sup>‡</sup> *Universidad de Murcia, SAI, 30071 Murcia, Spain. Fax: +34 968 367302; Tel: +34  
868 88 4165. E-mail: [dbc@um.es](mailto:dbc@um.es)*

### Table of contents

|                                                                                                                                                                                                    |     |
|----------------------------------------------------------------------------------------------------------------------------------------------------------------------------------------------------|-----|
| <b>Table SI 1.</b> Selected geometrical parameters in experimental and calculated structures of complexes <b>2</b> and <b>6</b> . .....                                                            | S2  |
| <b>Figure SI 1.</b> Association of molecules of <b>6</b> via C(12)H12•••N(3) bonds.....                                                                                                            | S3  |
| <b>Calculated structures.</b> Cartesian coordinates and energies for all calculated species. ....                                                                                                  | S4  |
| <b>Table SI 2.</b> Charges and HSAB-derived global and group parameters for the reaction of N1, N3 or N7 atoms in derivatives of 9-mhypH with the Pt atom in [Pt(PPh3)(dmab)] <sup>+</sup> . ..... | S12 |

**Table SI 1.** Selected geometrical parameters (distances in Å and angles in degrees) for the experimental (X-ray diffraction) and calculated (method A and B) structures of complexes **2** and **6**.

|            | 2          |        |        | 6         |        |        |
|------------|------------|--------|--------|-----------|--------|--------|
|            | Exp.       | Calc.A | Calc.B | Exp.      | Calc.A | Calc.B |
| Pt1-P1     | 2.2333(5)  | 2.285  | 2.263  | 2.2148(9) | 2.265  | 2.244  |
| Pt1-C1     | 2.016(2)   | 2.028  | 2.027  | 2.017(3)  | 2.043  | 2.041  |
| Pt1-N1     | 2.1390(17) | 2.196  | 2.197  | 2.138(3)  | 2.196  | 2.197  |
| Pt1-N2     | 2.1253(18) | 2.172  | 2.158  | 2.108(3)  | 2.156  | 2.147  |
| C1-Pt1-P1  | 94.34(6)   | 95.51  | 95.18  | 94.94(11) | 96.43  | 95.94  |
| P1-Pt1-N2  | 91.64(5)   | 91.62  | 92.45  | 93.18(8)  | 92.40  | 93.18  |
| N1-Pt1-N2  | 92.67(7)   | 92.55  | 92.04  | 90.25(11) | 90.68  | 90.42  |
| Pt1-N2-C15 | 131.05(14) | 126.22 | 126.79 | -         | -      | -      |
| Pt1-N2-C14 | -          | -      | -      | 117.8(2)  | 116.76 | 116.41 |

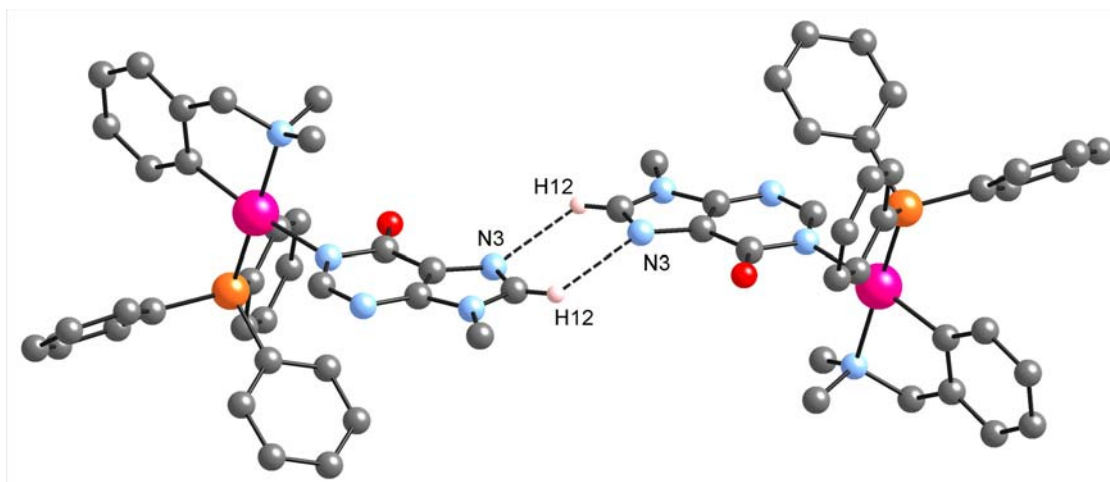

**Figure SI 1.** Association of molecules of **6** via C(12)H12...N(3) bonds

**Calculated structures.-** Cartesian coordinates (Å) and energies (au) for all calculated species.-

**Compound 9-mhpyH (method B):** E = -526.718992739 au

|   |             |            |             |   |             |             |             |
|---|-------------|------------|-------------|---|-------------|-------------|-------------|
| N | 0.00000000  | 0.00000000 | 0.00000000  | H | -0.50001912 | -0.88901911 | -0.00000000 |
| C | 1.36530617  | 0.00000000 | 0.00000000  | H | 1.84769011  | -0.98112201 | 0.00000000  |
| N | 2.10416382  | 1.08134353 | 0.00000000  | O | -2.07843892 | 1.01073722  | -0.00000000 |
| C | 1.35262645  | 2.21675676 | 0.00000000  | H | 0.84273157  | 5.41417910  | 0.00000000  |
| C | -0.04583896 | 2.34912902 | 0.00000000  | C | 3.25299257  | 3.88184725  | -0.00000000 |
| C | -0.86495432 | 1.15689348 | 0.00000000  | H | 3.49557482  | 4.46901650  | -0.89672358 |
| N | -0.40883274 | 3.67806800 | 0.00000000  | H | 3.84739578  | 2.96043634  | -0.00000000 |
| C | 0.73782249  | 4.33097968 | 0.00000000  | H | 3.49557934  | 4.46900330  | 0.89673143  |
| N | 1.84613659  | 3.50353550 | -0.00000000 |   |             |             |             |

**Compound 9-mhpyH·ClO<sub>4</sub><sup>-</sup> (method B):** E = -1287.87960393 au

|   |             |             |             |    |             |             |             |
|---|-------------|-------------|-------------|----|-------------|-------------|-------------|
| N | 0.00000000  | 0.00000000  | 0.00000000  | O  | -2.06912307 | 1.05208590  | 0.00743776  |
| C | 1.35879911  | 0.00000000  | 0.00000000  | H  | 0.87604362  | 5.42101249  | 0.00069831  |
| N | 2.11666774  | 1.08222663  | 0.00000000  | C  | 3.27770000  | 3.86140199  | -0.00349393 |
| C | 1.36972031  | 2.21460810  | 0.00000000  | H  | 3.53541509  | 4.44270863  | -0.90165053 |
| C | -0.02499088 | 2.35172101  | 0.00187731  | H  | 3.85259186  | 2.92638478  | -0.00304696 |
| C | -0.84682129 | 1.15482149  | 0.00314971  | H  | 3.53841217  | 4.44566354  | 0.89188162  |
| N | -0.38284024 | 3.68849155  | 0.00280001  | O  | -0.75116807 | -2.73763766 | 0.06736527  |
| C | 0.76522121  | 4.33782927  | 0.00107745  | Cl | 0.30094876  | -3.74201852 | -0.27129564 |
| N | 1.87017403  | 3.50432470  | -0.00052430 | O  | 1.61085218  | -3.22336836 | 0.17942390  |
| H | -0.44913681 | -0.94359057 | -0.00180943 | O  | 0.32221399  | -3.94713583 | -1.72286384 |
| H | 1.81424379  | -0.99581644 | 0.00184594  | O  | -0.00423966 | -4.99437858 | 0.42204554  |

**Compound 9-mhpy<sup>-</sup> (method B):** E = -526.164346263 au

|   |             |            |            |   |             |             |             |
|---|-------------|------------|------------|---|-------------|-------------|-------------|
| N | 0.00000000  | 0.00000000 | 0.00000000 | N | 2.09362722  | 3.46972999  | 0.00000000  |
| C | 1.32844595  | 0.00000000 | 0.00000000 | H | 1.80246475  | -0.99505398 | -0.00000000 |
| N | 2.21082080  | 1.03223563 | 0.00000000 | O | -1.96513547 | 1.23284938  | 0.00000000  |
| C | 1.53167126  | 2.19587034 | 0.00000000 | H | 1.18837756  | 5.43262423  | 0.00000000  |
| C | 0.14243719  | 2.39300748 | 0.00000000 | C | 3.51134267  | 3.75256549  | 0.00000000  |
| C | -0.72052687 | 1.21340941 | 0.00000000 | H | 3.81276402  | 4.32077046  | -0.89611285 |
| N | -0.14918649 | 3.75545619 | 0.00000000 | H | 4.03081461  | 2.78359388  | 0.00000000  |
| C | 1.02544624  | 4.35471924 | 0.00000000 | H | 3.81277255  | 4.32073645  | 0.89613214  |

**Complex [Pt(PPh<sub>3</sub>)(dmap)]<sup>+</sup> (method B):** E = -1561.00409996 au

|    |            |             |             |   |             |             |             |
|----|------------|-------------|-------------|---|-------------|-------------|-------------|
| Pt | 0.00000000 | 0.00000000  | 0.00000000  | H | 1.86167961  | -3.35331384 | -0.63850660 |
| C  | 1.99406428 | 0.00000000  | 0.00000000  | N | 0.17815178  | -2.02282134 | -0.75303299 |
| C  | 2.90106032 | 1.06144237  | 0.00000000  | C | 0.31697086  | -2.01754007 | -2.23788223 |
| C  | 4.27682821 | 0.79778460  | -0.06362861 | H | 0.47248834  | -3.04752320 | -2.60269035 |
| C  | 4.75216652 | -0.51062994 | -0.14801589 | H | 1.17373401  | -1.39650891 | -2.52289917 |
| C  | 3.84558994 | -1.57266964 | -0.18113283 | H | -0.59379168 | -1.60720628 | -2.69075321 |
| C  | 2.46889349 | -1.33133884 | -0.10982130 | C | -0.93299114 | -2.92778586 | -0.35955228 |
| H  | 2.58134626 | 2.10006806  | 0.04877036  | H | -1.86456446 | -2.58298444 | -0.82769413 |
| H  | 4.97392296 | 1.63767745  | -0.05372942 | H | -1.04840082 | -2.91694031 | 0.73127486  |
| H  | 5.82427214 | -0.70410393 | -0.20294203 | H | -0.73074748 | -3.95992070 | -0.69421960 |
| H  | 4.20731286 | -2.60049963 | -0.26773414 | P | -0.00000065 | 2.12291927  | 0.79036503  |
| C  | 1.47065378 | -2.46347954 | -0.11487225 | C | 0.23271841  | 3.44386596  | -0.45391746 |
| H  | 1.22509468 | -2.76293911 | 0.91619960  | C | 0.77304048  | 3.15892732  | -1.71900502 |

|   |             |            |             |   |             |            |             |
|---|-------------|------------|-------------|---|-------------|------------|-------------|
| C | 0.90795335  | 4.17415636 | -2.67003998 | H | 3.04079174  | 4.83400312 | 3.67817021  |
| C | 0.50275465  | 5.47690859 | -2.36809139 | H | 3.18892959  | 3.07801811 | 5.44026419  |
| C | -0.05017381 | 5.76480895 | -1.11533643 | H | 1.98077468  | 0.91674714 | 5.14552451  |
| C | -0.19164594 | 4.75488568 | -0.16235105 | H | 0.64032199  | 0.50957998 | 3.09534032  |
| H | 1.07818989  | 2.13985872 | -1.96199363 | C | -1.73181688 | 2.35321107 | 1.35848343  |
| H | 1.32576996  | 3.94333056 | -3.65142554 | C | -2.74828775 | 2.19787063 | 0.39293001  |
| H | 0.60699912  | 6.26795533 | -3.11269500 | C | -4.09058636 | 2.29385601 | 0.76316924  |
| H | -0.38204762 | 6.77784607 | -0.88167265 | C | -4.43218551 | 2.54535239 | 2.09660355  |
| H | -0.65204090 | 4.98385743 | 0.80085832  | C | -3.42845597 | 2.70180515 | 3.05698545  |
| C | 1.05702382  | 2.45816644 | 2.24011001  | C | -2.08155153 | 2.60269216 | 2.69460536  |
| C | 1.74240728  | 3.67211724 | 2.40720251  | H | -2.48685741 | 2.03060595 | -0.65590826 |
| C | 2.50743981  | 3.88964065 | 3.55697825  | H | -4.87092367 | 2.18062933 | 0.00855054  |
| C | 2.59030414  | 2.90442133 | 4.54443874  | H | -5.48156534 | 2.62480526 | 2.38539870  |
| C | 1.91189993  | 1.69171446 | 4.38024548  | H | -3.69279182 | 2.90618765 | 4.09602238  |
| C | 1.15350670  | 1.46435475 | 3.23106507  | H | -1.30598768 | 2.72611413 | 3.45176425  |
| H | 1.69083651  | 4.44630471 | 1.64032121  |   |             |            |             |

Complex [Pt(PPh<sub>3</sub>)(dmap)(N7-9mhypH)] (method A): E = -2087.18376645 au

|    |             |             |             |   |             |             |             |
|----|-------------|-------------|-------------|---|-------------|-------------|-------------|
| Pt | 0.00000000  | 0.00000000  | 0.00000000  | C | 2.33173347  | 3.80580138  | 3.75765823  |
| C  | 2.02894396  | 0.00000000  | 0.00000000  | C | 2.65947526  | 2.70680526  | 4.56778002  |
| C  | 2.92216041  | 1.09261315  | 0.00000000  | C | 2.15400250  | 1.43335313  | 4.25847108  |
| C  | 4.31383394  | 0.89906214  | -0.07035691 | C | 1.32289335  | 1.25940375  | 3.14165643  |
| C  | 4.85057505  | -0.39420388 | -0.14697978 | H | 1.25208924  | 4.50363587  | 2.01756581  |
| C  | 3.98399194  | -1.49754474 | -0.17308585 | H | 2.73528539  | 4.79722738  | 3.98630224  |
| C  | 2.59415550  | -1.30450215 | -0.10004124 | H | 3.31735680  | 2.84044102  | 5.43220498  |
| H  | 2.54826323  | 2.11931544  | 0.05078110  | H | 2.42050494  | 0.57017215  | 4.87652353  |
| H  | 4.97802573  | 1.76981341  | -0.06690700 | H | 0.96253189  | 0.26106849  | 2.86900574  |
| H  | 5.93315856  | -0.54372916 | -0.20275577 | C | -1.85562778 | 2.41675571  | 1.69695466  |
| H  | 4.38905183  | -2.51295891 | -0.25686040 | C | -2.93276995 | 2.82370271  | 0.87703845  |
| C  | 1.62447894  | -2.45579993 | -0.14507862 | C | -4.20342119 | 3.04331928  | 1.43225353  |
| H  | 1.31859984  | -2.76829420 | 0.87040711  | C | -4.41586978 | 2.85520240  | 2.81005471  |
| H  | 2.03485353  | -3.34482192 | -0.66452378 | C | -3.35060654 | 2.44748690  | 3.62981555  |
| N  | 0.36912977  | -1.99653705 | -0.84887560 | C | -2.07575418 | 2.22966066  | 3.07843095  |
| C  | 0.62665127  | -1.86634266 | -2.32004799 | H | -2.77275936 | 2.98924774  | -0.19333255 |
| H  | 0.81113394  | -2.86770635 | -2.75538937 | H | -5.02451080 | 3.37956029  | 0.79063585  |
| H  | 1.51010699  | -1.23163782 | -2.47285793 | H | -5.40230916 | 3.04676058  | 3.24475311  |
| H  | -0.23996281 | -1.39075898 | -2.80124086 | H | -3.50280270 | 2.31756372  | 4.70621301  |
| C  | -0.71519976 | -2.99088942 | -0.63053440 | H | -1.24658280 | 1.93527638  | 3.72965975  |
| H  | -1.61680815 | -2.68059924 | -1.17759169 | N | -4.08832861 | 0.26144974  | -3.21434459 |
| H  | -0.94330398 | -3.05934371 | 0.44376894  | C | -5.32554163 | 0.03314618  | -2.66377779 |
| H  | -0.39720967 | -3.98487324 | -0.99958183 | N | -5.53087470 | -0.26853768 | -1.39810902 |
| P  | -0.19556090 | 2.07988566  | 0.93758800  | C | -4.37288602 | -0.32587937 | -0.68286200 |
| C  | -0.00891930 | 3.44619032  | -0.28271415 | C | -3.05935452 | -0.10827819 | -1.13322192 |
| C  | 0.48780325  | 3.15591324  | -1.57199933 | C | -2.82667516 | 0.20309939  | -2.52798292 |
| C  | 0.64396430  | 4.18446401  | -2.51498210 | N | -2.17715273 | -0.26513279 | -0.07363244 |
| C  | 0.30425910  | 5.50487487  | -2.18178902 | C | -2.94068610 | -0.56920344 | 0.98150939  |
| C  | -0.20814541 | 5.79829763  | -0.90618716 | N | -4.27422155 | -0.62356742 | 0.66532922  |
| C  | -0.37173991 | 4.77551606  | 0.03993234  | H | -4.01628626 | 0.48160029  | -4.21183675 |
| H  | 0.73365951  | 2.12143713  | -1.83359306 | H | -6.17982763 | 0.11179650  | -3.34378612 |
| H  | 1.02666469  | 3.94859846  | -3.51274810 | O | -1.76932758 | 0.39483771  | -3.13543222 |
| H  | 0.42794766  | 6.30547571  | -2.91792753 | H | -2.56772604 | -0.73373464 | 1.99012370  |
| H  | -0.48760818 | 6.82461860  | -0.64786996 | C | -5.39497068 | -0.89189063 | 1.57446953  |
| H  | -0.80044060 | 5.01065783  | 1.01964071  | H | -5.21770819 | -1.82980981 | 2.12138437  |
| C  | 0.97592056  | 2.36513903  | 2.33396518  | H | -6.30334100 | -0.98719247 | 0.96408378  |
| C  | 1.48947229  | 3.64084430  | 2.64627846  | H | -5.51068338 | -0.05676232 | 2.28207127  |

Complex [Pt(PPh<sub>3</sub>)(dmap)(N3-9mhypH·ClO<sub>4</sub>)] (method A): E = -2848.17786261 au

|    |            |            |            |   |            |             |             |
|----|------------|------------|------------|---|------------|-------------|-------------|
| Pt | 0.00000000 | 0.00000000 | 0.00000000 | C | 4.32428953 | 0.87618022  | -0.02878206 |
| C  | 2.02880295 | 0.00000000 | 0.00000000 | C | 4.84895976 | -0.42383145 | -0.05814124 |
| C  | 2.93280757 | 1.08374029 | 0.00000000 | C | 3.97157891 | -1.51960163 | -0.06947855 |

|   |             |             |             |    |             |             |             |
|---|-------------|-------------|-------------|----|-------------|-------------|-------------|
| C | 2.58235828  | -1.31304616 | -0.03764344 | H  | 3.31230535  | 2.59026319  | 5.52921048  |
| H | 2.56681066  | 2.11414199  | 0.03285393  | H  | 2.24121077  | 0.38379971  | 4.99724246  |
| H | 4.99736990  | 1.74061582  | -0.02329538 | H  | 0.76555593  | 0.15300232  | 3.02376466  |
| H | 5.93143977  | -0.58568638 | -0.07891227 | C  | -1.89404752 | 2.28050306  | 1.77786262  |
| H | 4.36774453  | -2.54162484 | -0.10089527 | C  | -2.96720673 | 2.72557178  | 0.97263505  |
| C | 1.60197521  | -2.45696560 | -0.03653030 | C  | -4.25799807 | 2.83527323  | 1.51043604  |
| H | 1.26570476  | -2.70471325 | 0.98662540  | C  | -4.49400389 | 2.49296864  | 2.85350225  |
| H | 2.01558799  | -3.37853157 | -0.49386516 | C  | -3.43386454 | 2.04359114  | 3.65543444  |
| N | 0.36525099  | -2.03307330 | -0.79550381 | C  | -2.13723890 | 1.93575449  | 3.12406235  |
| C | 0.66147969  | -1.96539665 | -2.25773837 | H  | -2.79403000 | 2.99409006  | -0.07480601 |
| H | 0.93947664  | -2.97075738 | -2.63099292 | H  | -5.08088112 | 3.18433069  | 0.87836511  |
| H | 1.49037868  | -1.26580941 | -2.43433057 | H  | -5.50322580 | 2.57159255  | 3.26972524  |
| H | -0.23568733 | -1.62114840 | -2.79353292 | H  | -3.60940343 | 1.76462959  | 4.69882392  |
| C | -0.71349151 | -3.03837036 | -0.56454241 | H  | -1.32541219 | 1.57105870  | 3.75946375  |
| H | -1.61962650 | -2.74237288 | -1.11333801 | N  | -3.79831580 | -1.51877096 | 1.35181458  |
| H | -0.92528150 | -3.12102126 | 0.51310982  | C  | -2.57961134 | -0.96438245 | 1.18340897  |
| H | -0.37781928 | -4.02509515 | -0.93810006 | N  | -2.17505091 | -0.36949867 | 0.05837806  |
| P | -0.22135335 | 2.03121256  | 1.02701770  | C  | -3.14071859 | -0.33846731 | -0.92300116 |
| C | -0.02502321 | 3.49387763  | -0.08486372 | C  | -4.43699552 | -0.88361191 | -0.83169552 |
| C | 0.58307253  | 3.33902612  | -1.34912033 | C  | -4.86921616 | -1.55680654 | 0.38435903  |
| C | 0.75451426  | 4.44660569  | -2.19534150 | N  | -5.13913120 | -0.67047139 | -2.00275616 |
| C | 0.31748958  | 5.71759392  | -1.78970038 | C  | -4.29341024 | -0.01262120 | -2.77820968 |
| C | -0.29627366 | 5.87978870  | -0.53619456 | N  | -3.05550956 | 0.22014294  | -2.18656309 |
| C | -0.47023429 | 4.77589288  | 0.31296083  | H  | -3.91994357 | -2.01682440 | -2.25243906 |
| H | 0.91871143  | 2.34411981  | -1.66119439 | H  | -1.88797207 | -1.02110165 | 2.03482143  |
| H | 1.23058405  | 4.31424546  | -3.17244888 | O  | -5.94039149 | -2.09705291 | 0.65035546  |
| H | 0.44997938  | 6.58053032  | -2.45032741 | H  | -4.50098407 | 0.33007466  | -3.79256995 |
| H | -0.64533864 | 6.86748395  | -0.21804648 | C  | -1.95319741 | 0.98917852  | -2.76250686 |
| H | -0.96744433 | 4.90773652  | 1.27932047  | H  | -1.77978404 | 0.66929620  | -3.80215475 |
| C | 0.95290381  | 2.24892998  | 2.43085877  | H  | -1.04426697 | 0.80304819  | -2.15845532 |
| C | 1.55017376  | 3.49042336  | 2.73200724  | H  | -2.17427241 | 2.06919142  | -2.74292238 |
| C | 2.40088149  | 3.60702736  | 3.84291867  | Cl | -1.34563533 | -2.80916477 | 3.88286477  |
| C | 2.65085213  | 2.49417406  | 4.66199129  | O  | -2.87497090 | -2.78085158 | 3.80002448  |
| C | 2.05547345  | 1.25740010  | 4.36507318  | O  | -0.83868095 | -1.36025145 | 3.79079022  |
| C | 1.21670832  | 1.12648198  | 3.24775835  | O  | -0.90529687 | -3.43571197 | 5.17019114  |
| H | 1.36560119  | 4.36334055  | 2.09877782  | O  | -0.79785189 | -3.57898042 | 2.68470263  |
| H | 2.86879335  | 4.57164377  | 4.06562674  |    |             |             |             |

Complex [Pt(PPh<sub>3</sub>)(dmap)(N7-9mhyphH·ClO<sub>4</sub>)] (method A): E = -2848.1818247 au

|    |             |             |             |   |             |            |             |
|----|-------------|-------------|-------------|---|-------------|------------|-------------|
| Pt | 0.00000000  | 0.00000000  | 0.00000000  | C | 0.33034248  | 3.10563290 | -1.63432295 |
| C  | 2.02846318  | 0.00000000  | 0.00000000  | C | 0.40210794  | 4.10942090 | -2.61360926 |
| C  | 2.92463632  | 1.09120375  | 0.00000000  | C | 0.09527007  | 5.43827114 | -2.28558467 |
| C  | 4.31582016  | 0.89857648  | -0.07952923 | C | -0.29940072 | 5.76686449 | -0.97686703 |
| C  | 4.85258406  | -0.39426887 | -0.16852767 | C | -0.38569039 | 4.76908059 | 0.00435287  |
| C  | 3.98473695  | -1.49684175 | -0.20193905 | H | 0.52638318  | 2.06148167 | -1.89850431 |
| C  | 2.59558519  | -1.30317645 | -0.11963683 | H | 0.67089194  | 3.84161277 | -3.63952278 |
| H  | 2.54767258  | 2.11724655  | 0.05155757  | H | 0.13659535  | 6.21560199 | -3.05489962 |
| H  | 4.98033073  | 1.76956139  | -0.07674007 | H | -0.56347819 | 6.79883003 | -0.72456234 |
| H  | 5.93516544  | -0.54353167 | -0.23258841 | H | -0.74562152 | 5.02737323 | 1.00579610  |
| H  | 4.38855307  | -2.51178508 | -0.30199010 | C | 0.95494054  | 2.38705404 | 2.31532315  |
| C  | 1.62196906  | -2.45204461 | -0.18568005 | C | 1.48702450  | 3.66081789 | 2.60140903  |
| H  | 1.31445148  | -2.78102838 | 0.82441308  | C | 2.33457330  | 3.83806442 | 3.70702681  |
| H  | 2.03182295  | -3.33302506 | -0.72059958 | C | 2.65054442  | 2.75236347 | 4.53915691  |
| N  | 0.36944383  | -1.97816577 | -0.88029757 | C | 2.12861218  | 1.47970547 | 4.25555129  |
| C  | 0.62251099  | -1.81342293 | -2.34908469 | C | 1.29270431  | 1.29446431 | 3.14404574  |
| H  | 0.78410036  | -2.80740814 | -2.81076441 | H | 1.25908646  | 4.51218642 | 1.95403742  |
| H  | 1.51793119  | -1.19251981 | -2.48858949 | H | 2.75133591  | 4.82915987 | 3.91383758  |
| H  | -0.23367775 | -1.30003546 | -2.81111864 | H | 3.31223740  | 2.89514865 | 5.39962013  |
| C  | -0.72292084 | -2.96686744 | -0.68416564 | H | 2.38620015  | 0.62491861 | 4.88937633  |
| H  | -1.62148698 | -2.63046980 | -1.21996157 | H | 0.92033832  | 0.29578524 | 2.88874977  |
| H  | -0.95072081 | -3.05787701 | 0.38861924  | C | -1.87831589 | 2.41605295 | 1.68318852  |
| H  | -0.41438088 | -3.95433049 | -1.07964966 | C | -2.94363307 | 2.85554843 | 0.86486359  |
| P  | -0.21953585 | 2.07914878  | 0.92094204  | C | -4.21601819 | 3.07527603 | 1.41659337  |
| C  | -0.05508675 | 3.43013820  | -0.31589800 | C | -4.43932056 | 2.85837588 | 2.78773187  |

|   |             |             |             |    |             |             |             |
|---|-------------|-------------|-------------|----|-------------|-------------|-------------|
| C | -3.38447605 | 2.42066840  | 3.60607638  | N  | -4.30593748 | -0.50920948 | 0.47618969  |
| C | -2.10923225 | 2.19954355  | 3.05862421  | H  | -3.70662629 | 1.31219430  | -4.21707842 |
| H | -2.78045619 | 3.04174994  | -0.20111871 | H  | -5.85755437 | 0.99728357  | -3.48757814 |
| H | -5.02759238 | 3.42718924  | 0.77178520  | O  | -1.48488363 | 0.63606918  | -3.03316868 |
| H | -5.42817980 | 3.04682279  | 3.21881832  | H  | -2.69149480 | -0.86486095 | 1.87499237  |
| H | -3.54643224 | 2.26587863  | 4.67811052  | C  | -5.49828784 | -0.76340906 | 1.28647013  |
| H | -1.28867461 | 1.87787404  | 3.70805731  | H  | -5.48118468 | -1.79065152 | 1.68262665  |
| N | -3.80065680 | 0.82469017  | -3.26150208 | H  | -6.37000917 | -0.63721620 | 0.62870024  |
| C | -5.07344050 | 0.66914806  | -2.79436918 | H  | -5.55566019 | -0.03986075 | 2.11464911  |
| N | -5.40372391 | 0.19738650  | -1.59370126 | Cl | -4.91314244 | 3.29974174  | -5.38751898 |
| C | -4.30671254 | -0.06625205 | -0.84237999 | O  | -3.84819420 | 2.17464782  | -5.58464442 |
| C | -2.96003566 | 0.08083057  | -1.20148227 | O  | -6.23571796 | 2.62583193  | -5.04750803 |
| C | -2.61890652 | 0.52331489  | -2.53883219 | O  | -4.47087717 | 4.17171228  | -4.23138134 |
| N | -2.15465935 | -0.24340423 | -0.11661660 | O  | -5.01884541 | 4.08271040  | -6.66208034 |
| C | -2.99276625 | -0.58657083 | 0.86758200  |    |             |             |             |

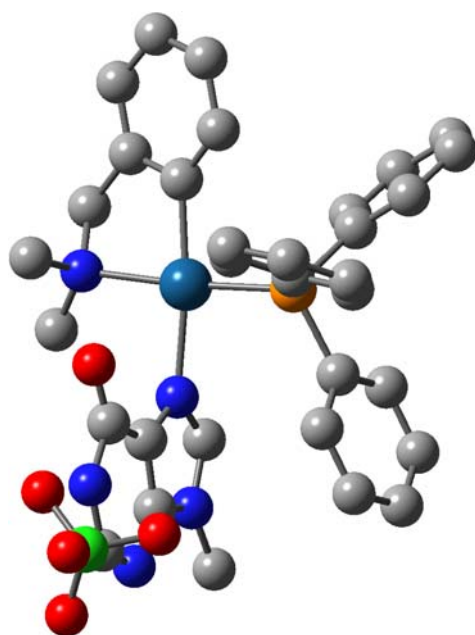

Complex [Pt(PPh<sub>3</sub>)(dmap)(N7-9mhyph·ClO<sub>4</sub>)] (method B): E = -2848.1818247 au

|    |             |             |             |   |             |            |             |
|----|-------------|-------------|-------------|---|-------------|------------|-------------|
| Pt | 0.00000000  | 0.00000000  | 0.00000000  | C | -0.00611867 | 3.40798421 | -0.38134719 |
| C  | 2.02749959  | 0.00000000  | 0.00000000  | C | 0.40896913  | 3.07279665 | -1.68042901 |
| C  | 2.92639691  | 1.08079358  | 0.00000000  | C | 0.51955589  | 4.06279562 | -2.66093039 |
| C  | 4.31113937  | 0.88405298  | -0.06361904 | C | 0.22065296  | 5.39155585 | -2.35372683 |
| C  | 4.84165381  | -0.40574894 | -0.13664141 | C | -0.20579810 | 5.73232560 | -1.06487479 |
| C  | 3.97180124  | -1.49884652 | -0.16619282 | C | -0.32856209 | 4.74742137 | -0.08417259 |
| C  | 2.58855639  | -1.29993984 | -0.09921373 | H | 0.60423284  | 2.02884017 | -1.93022837 |
| H  | 2.55804150  | 2.10675112  | 0.04459813  | H | 0.81585816  | 3.78504242 | -3.67344639 |
| H  | 4.97698908  | 1.75003595  | -0.06221776 | H | 0.29417930  | 6.16070479 | -3.12469619 |
| H  | 5.92098737  | -0.55965010 | -0.18895506 | H | -0.46476119 | 6.76602483 | -0.82813233 |
| H  | 4.37131970  | -2.51350103 | -0.25175313 | H | -0.70924730 | 5.01800798 | 0.90256287  |
| C  | 1.62131369  | -2.44715844 | -0.15275393 | C | 0.95096038  | 2.40901329 | 2.26226027  |
| H  | 1.32324194  | -2.76734564 | 0.85934013  | C | 1.51782444  | 3.66928024 | 2.50727487  |
| H  | 2.03637893  | -3.32796904 | -0.67684422 | C | 2.35488203  | 3.86311027 | 3.61007756  |
| N  | 0.36870704  | -1.99367392 | -0.84689037 | C | 2.62759599  | 2.80652409 | 4.48317496  |
| C  | 0.62074256  | -1.85328886 | -2.31329072 | C | 2.07181011  | 1.54642431 | 4.24198108  |
| H  | 0.78573801  | -2.85223976 | -2.75489164 | C | 1.24632645  | 1.34618012 | 3.13353406  |
| H  | 1.51194743  | -1.23479306 | -2.46581319 | H | 1.32743463  | 4.50028048 | 1.82743050  |
| H  | -0.23452529 | -1.35661682 | -2.78748402 | H | 2.79859452  | 4.84557525 | 3.78268440  |
| C  | -0.70536668 | -2.99198842 | -0.63685585 | H | 3.28291344  | 2.96125419 | 5.34248309  |
| H  | -1.60575567 | -2.68544174 | -1.18113666 | H | 2.29549177  | 0.71113921 | 4.90844774  |
| H  | -0.93441722 | -3.07082454 | 0.43331214  | H | 0.84610921  | 0.35270706 | 2.91802407  |
| H  | -0.37965029 | -3.97799891 | -1.01248172 | C | -1.85822948 | 2.45992232 | 1.59608632  |
| P  | -0.20430349 | 2.08093284  | 0.86601627  | C | -2.91070220 | 2.85369316 | 0.74922028  |

|   |             |             |             |    |             |             |             |
|---|-------------|-------------|-------------|----|-------------|-------------|-------------|
| C | -4.18032191 | 3.11135624  | 1.27175282  | C  | -2.94883613 | -0.62670224 | 0.91032109  |
| C | -4.41604772 | 2.97907336  | 2.64476595  | N  | -4.26000279 | -0.64230899 | 0.52409225  |
| C | -3.37558961 | 2.58772187  | 3.49261911  | H  | -3.79577917 | 0.99569807  | -4.23785882 |
| C | -2.10293457 | 2.32847493  | 2.97285947  | H  | -5.90411820 | 0.56357987  | -3.48707696 |
| H | -2.73922421 | 2.97731184  | -0.32141433 | O  | -1.53730622 | 0.54937749  | -3.02115053 |
| H | -4.98226739 | 3.42542706  | 0.60107403  | H  | -2.63089843 | -0.85266340 | 1.92292180  |
| H | -5.40544240 | 3.19481068  | 3.05315546  | C  | -5.42824369 | -0.95407619 | 1.34097672  |
| H | -3.54717036 | 2.49770617  | 4.56736062  | H  | -5.39830147 | -1.99958206 | 1.67695635  |
| H | -1.29440475 | 2.04283259  | 3.64795211  | H  | -6.31324326 | -0.79943952 | 0.71235254  |
| N | -3.84880069 | 0.55582651  | -3.25565261 | H  | -5.47426973 | -0.28465730 | 2.21009040  |
| C | -5.10048344 | 0.33378920  | -2.78016424 | Cl | -5.18641676 | 2.71659402  | -5.48842896 |
| N | -5.39639256 | -0.10100051 | -1.56399526 | O  | -4.02932737 | 1.75626649  | -5.63836775 |
| C | -4.29095452 | -0.25946179 | -0.80820979 | O  | -6.41357453 | 1.92294226  | -5.30192656 |
| C | -2.96204723 | -0.04418698 | -1.17770646 | O  | -4.94363338 | 3.54107654  | -4.29755142 |
| C | -2.65387750 | 0.37198069  | -2.52769492 | O  | -5.26847558 | 3.52807923  | -6.69065132 |
| N | -2.13904122 | -0.27434339 | -0.08650175 |    |             |             |             |

Complex [Pt(PPh<sub>3</sub>)(dmap)(NI-9mhy<sup>-</sup>)] (method A):

E = -2086.75409557 au

|    |             |             |             |   |             |             |             |
|----|-------------|-------------|-------------|---|-------------|-------------|-------------|
| Pt | 0.00000000  | 0.00000000  | 0.00000000  | C | 2.11732843  | 4.20673263  | 3.42859338  |
| C  | 2.04322817  | 0.00000000  | 0.00000000  | C | 2.41105715  | 3.20297199  | 4.36558974  |
| C  | 2.95825485  | 1.07862408  | 0.00000000  | C | 1.92643076  | 1.89966124  | 4.16818054  |
| C  | 4.34904523  | 0.87570978  | -0.06024913 | C | 1.15170979  | 1.60106460  | 3.03704559  |
| C  | 4.87702633  | -0.42183001 | -0.13015037 | H | 1.11674963  | 4.70380310  | 1.57454174  |
| C  | 3.99805201  | -1.51589882 | -0.14889550 | H | 2.50348378  | 5.22161686  | 3.57050585  |
| C  | 2.61002663  | -1.30844269 | -0.08064332 | H | 3.02509842  | 3.43381075  | 5.24236691  |
| H  | 2.59386775  | 2.10985069  | 0.04551666  | H | 2.16415691  | 1.10863836  | 4.88696502  |
| H  | 5.02072378  | 1.74181922  | -0.05567860 | H | 0.80480427  | 0.57812031  | 2.85111521  |
| H  | 5.95906289  | -0.58172629 | -0.18232424 | C | -1.94330718 | 2.62173282  | 1.26528440  |
| H  | 4.39344158  | -2.53711090 | -0.21901705 | C | -2.97869199 | 2.74796871  | 0.31139344  |
| C  | 1.64057143  | -2.46301252 | -0.07887391 | C | -4.27594219 | 3.08548293  | 0.72227245  |
| H  | 1.37436650  | -2.75502864 | 0.95422685  | C | -4.55529907 | 3.29574763  | 2.08416287  |
| H  | 2.04086805  | -3.36254661 | -0.59107840 | C | -3.53267997 | 3.16373359  | 3.03528245  |
| N  | 0.35926613  | -2.03526720 | -0.74146464 | C | -2.22968559 | 2.82625687  | 2.63015121  |
| C  | 0.54118392  | -1.94464572 | -2.22640431 | H | -2.77130353 | 2.57867899  | -0.75045454 |
| H  | 0.70706951  | -2.95899487 | -2.64207361 | H | -5.06968799 | 3.17992090  | -0.02559490 |
| H  | 1.41577286  | -1.31398738 | -2.43924629 | H | -5.56942128 | 3.56001412  | 2.40163095  |
| H  | -0.35821010 | -1.48223174 | -2.66149475 | H | -3.74334004 | 3.32466841  | 4.09773916  |
| C  | -0.71079841 | -3.02530494 | -0.44636539 | H | -1.43671639 | 2.72811659  | 3.37790173  |
| H  | -1.62845746 | -2.74402443 | -0.97954612 | N | -2.12925091 | -0.33780025 | -0.02835179 |
| H  | -0.91225773 | -3.04182864 | 0.63494986  | C | -2.79566853 | -0.66408114 | 1.11200349  |
| H  | -0.38912573 | -4.03188275 | -0.77975422 | N | -4.08569108 | -0.98723677 | 1.24182786  |
| P  | -0.25358771 | 2.14560370  | 0.67946045  | C | -4.72044347 | -0.93938099 | 0.04159368  |
| C  | 0.04555607  | 3.36570893  | -0.67612261 | C | -4.17955104 | -0.61234497 | -1.21705610 |
| C  | 0.63900209  | 2.93077148  | -1.87941078 | C | -2.77001964 | -0.28597814 | -1.29961587 |
| C  | 0.86366903  | 3.84063844  | -2.92463865 | N | -5.15803566 | -0.67081385 | -2.20265124 |
| C  | 0.49566049  | 5.18724207  | -2.78051641 | C | -6.25584336 | -1.02428599 | -1.54957197 |
| C  | -0.11441073 | 5.62381885  | -1.59232970 | N | -6.06398481 | -1.19976795 | -0.18442704 |
| C  | -0.34734132 | 4.71778227  | -0.54666875 | H | -2.18861394 | -0.65864650 | 2.02600616  |
| H  | 0.89708280  | 1.87304913  | -1.99335869 | O | -2.11320338 | 0.00323145  | -2.32614508 |
| H  | 1.31591203  | 3.48989830  | -3.85779140 | H | -7.23820057 | -1.16756740 | -2.00226425 |
| H  | 0.66807585  | 5.89430628  | -3.59873613 | C | -7.03300379 | -1.62626581 | 0.81800142  |
| H  | -0.42259233 | 6.66890557  | -1.48291758 | H | -8.02207638 | -1.20375942 | 0.58193345  |
| H  | -0.86103406 | 5.05714110  | 0.35894638  | H | -6.70022477 | -1.25617870 | 1.79898634  |
| C  | 0.83879340  | 2.60969976  | 2.09998623  | H | -7.10778865 | -2.72660270 | 0.86161359  |
| C  | 1.33085252  | 3.91542995  | 2.30217046  |   |             |             |             |



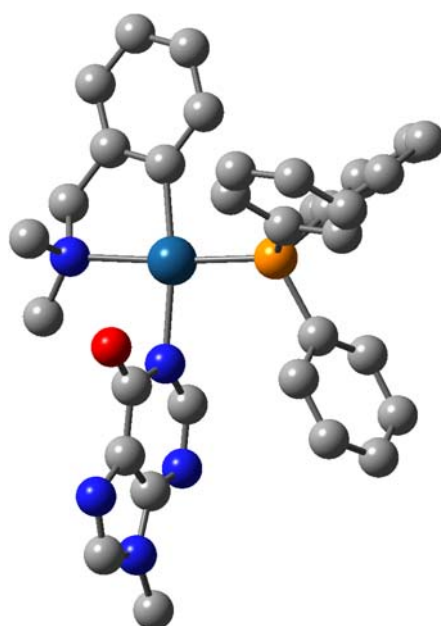

Complex **[Pt(PPh<sub>3</sub>)(dmap)(NI-9mhyp)]** (method B):  $E = -2087.34906790$  au

|    |             |             |             |   |             |             |             |
|----|-------------|-------------|-------------|---|-------------|-------------|-------------|
| Pt | 0.00000000  | 0.00000000  | 0.00000000  | C | 2.20289048  | 4.14086854  | 3.38602612  |
| C  | 2.04096974  | 0.00000000  | 0.00000000  | C | 2.43799938  | 3.15735759  | 4.35085242  |
| C  | 2.95513429  | 1.07090769  | 0.00000000  | C | 1.89121145  | 1.88086879  | 4.18733042  |
| C  | 4.33949689  | 0.86704704  | -0.05319344 | C | 1.11434716  | 1.59046144  | 3.06366245  |
| C  | 4.86343460  | -0.42602420 | -0.11618785 | H | 1.24903427  | 4.63157497  | 1.51747742  |
| C  | 3.98472501  | -1.51251448 | -0.13367819 | H | 2.63790925  | 5.13591181  | 3.50006190  |
| C  | 2.60248344  | -1.30340056 | -0.07287842 | H | 3.05556253  | 3.38182671  | 5.22286214  |
| H  | 2.59674729  | 2.10080148  | 0.04341708  | H | 2.08244723  | 1.10252933  | 4.92873429  |
| H  | 5.01061066  | 1.72952335  | -0.04974275 | H | 0.71711900  | 0.58409209  | 2.91193706  |
| H  | 5.94215715  | -0.58781230 | -0.16258914 | C | -1.90781700 | 2.61470546  | 1.27354114  |
| H  | 4.37748819  | -2.53175265 | -0.19863499 | C | -2.94321341 | 2.73408320  | 0.32822459  |
| C  | 1.63823490  | -2.45478338 | -0.07094090 | C | -4.22947277 | 3.08845789  | 0.73594854  |
| H  | 1.37506843  | -2.74479589 | 0.95990351  | C | -4.50061947 | 3.32371807  | 2.08874047  |
| H  | 2.04462063  | -3.35043554 | -0.57776811 | C | -3.47897619 | 3.20101297  | 3.03239487  |
| N  | 0.36122690  | -2.03843710 | -0.73597267 | C | -2.18674438 | 2.84727915  | 2.62861016  |
| C  | 0.55170204  | -1.95973387 | -2.21541173 | H | -2.74392709 | 2.54800340  | -0.72918995 |
| H  | 0.72889192  | -2.97413414 | -2.61750414 | H | -5.02347259 | 3.17559621  | -0.00803935 |
| H  | 1.41962502  | -1.32663455 | -2.43190621 | H | -5.50844815 | 3.60027604  | 2.40500778  |
| H  | -0.34550637 | -1.51459563 | -2.66423079 | H | -3.68240145 | 3.38208033  | 4.08980532  |
| C  | -0.69544644 | -3.03593961 | -0.44283043 | H | -1.39453955 | 2.76141848  | 3.37380311  |
| H  | -1.61216692 | -2.77138421 | -0.97992085 | N | -2.11855236 | -0.34745150 | -0.03022909 |
| H  | -0.90078862 | -3.05437178 | 0.63446712  | C | -2.78923901 | -0.67862227 | 1.09894802  |
| H  | -0.36096384 | -4.03670787 | -0.77027282 | N | -4.06798167 | -1.01911187 | 1.21567836  |
| P  | -0.23204907 | 2.12471534  | 0.68234981  | C | -4.69250066 | -0.99114035 | 0.01665501  |
| C  | 0.06719320  | 3.35626772  | -0.65259536 | C | -4.14680375 | -0.66205143 | -1.23265432 |
| C  | 0.65324727  | 2.94274122  | -1.85900442 | C | -2.74636165 | -0.31266723 | -1.30399601 |
| C  | 0.87441806  | 3.86262057  | -2.88785679 | N | -5.11106757 | -0.75059327 | -2.22296397 |
| C  | 0.51024694  | 5.20135516  | -2.72431716 | C | -6.20357464 | -1.12164909 | -1.58440861 |
| C  | -0.09160298 | 5.61869092  | -1.53217390 | N | -6.02178426 | -1.28660927 | -0.22133597 |
| C  | -0.31938417 | 4.70176239  | -0.50400733 | H | -2.19452462 | -0.66102237 | 2.01812471  |
| H  | 0.91246714  | 1.89101381  | -1.99045260 | O | -2.09206550 | -0.01865891 | -2.31919439 |
| H  | 1.32162157  | 3.52547841  | -3.82480363 | H | -7.17422124 | -1.29263059 | -2.04707483 |
| H  | 0.67892696  | 5.91776991  | -3.53093622 | C | -6.99606599 | -1.68987915 | 0.77949069  |
| H  | -0.39732521 | 6.65935419  | -1.40624946 | H | -7.84958731 | -0.99667076 | 0.79625779  |
| H  | -0.82551695 | 5.02941233  | 0.40612491  | H | -6.49554003 | -1.66888399 | 1.75564832  |
| C  | 0.85932209  | 2.57863542  | 2.09753748  | H | -7.36261884 | -2.70866035 | 0.58497896  |
| C  | 1.41404387  | 3.85659693  | 2.26715736  |   |             |             |             |

Complex **[Pt(PPh<sub>3</sub>)(dmap)(N3-9mhyp)]** (method A):  $E = -2086.7283546$  au

|    |             |             |             |   |             |             |             |
|----|-------------|-------------|-------------|---|-------------|-------------|-------------|
| Pt | 0.00000000  | 0.00000000  | 0.00000000  | C | 2.14481781  | 4.32573282  | 3.33815315  |
| C  | 2.04053795  | 0.00000000  | 0.00000000  | C | 2.65231397  | 3.34360834  | 4.20411660  |
| C  | 2.94574536  | 1.08635917  | 0.00000000  | C | 2.29080377  | 1.99832698  | 4.02460053  |
| C  | 4.33465403  | 0.89420386  | -0.11541578 | C | 1.42523576  | 1.63574180  | 2.98141248  |
| C  | 4.86703040  | -0.39753436 | -0.23960741 | H | 0.88179370  | 4.74087181  | 1.62785814  |
| C  | 3.99533387  | -1.49736758 | -0.26496648 | H | 2.43171829  | 5.37448364  | 3.46717045  |
| C  | 2.60889189  | -1.30153122 | -0.14672268 | H | 3.33560663  | 3.62508897  | 5.01195752  |
| H  | 2.57565250  | 2.11222221  | 0.09314265  | H | 2.69481865  | 1.22633289  | 4.68749537  |
| H  | 5.00136038  | 1.76385058  | -0.10955711 | H | 1.17165121  | 0.58419967  | 2.81087338  |
| H  | 5.94758817  | -0.54816405 | -0.33104118 | C | -1.94614516 | 2.40378729  | 1.63646045  |
| H  | 4.39467720  | -2.51235832 | -0.38284771 | C | -3.11537030 | 2.49411656  | 0.84703142  |
| C  | 1.64131553  | -2.45739342 | -0.17677967 | C | -4.36766713 | 2.66241922  | 1.45536893  |
| H  | 1.36974073  | -2.77854346 | 0.84604958  | C | -4.46845838 | 2.74640051  | 2.85465852  |
| H  | 2.04343417  | -3.34260571 | -0.71090558 | C | -3.31078881 | 2.66773070  | 3.64428836  |
| N  | 0.35953551  | -2.01135606 | -0.83135096 | C | -2.05309743 | 2.49552474  | 3.04119405  |
| C  | 0.55150027  | -1.88175901 | -2.30839901 | H | -3.05594562 | 2.42225027  | -0.24295277 |
| H  | 0.77389977  | -2.87474085 | -2.74709958 | H | -5.26500089 | 2.71297852  | 0.83161512  |
| H  | 1.38603680  | -1.19535112 | -2.50773057 | H | -5.44850685 | 2.87127351  | 3.32587807  |
| H  | -0.37112803 | -1.48455705 | -2.75637553 | H | -3.38070767 | 2.74300011  | 4.73454405  |
| C  | -0.71539953 | -3.01016419 | -0.57478248 | H | -1.15602243 | 2.44164339  | 3.66550399  |
| H  | -1.64303991 | -2.68870966 | -1.06669060 | N | -3.86173993 | -0.05885230 | -1.99478237 |
| H  | -0.89345444 | -3.08993826 | 0.50728995  | C | -2.63574716 | 0.07706345  | -1.53581061 |
| H  | -0.41023585 | -3.99846901 | -0.97054971 | N | -2.12441035 | -0.26583324 | -0.29895876 |
| P  | -0.31325592 | 2.10195687  | 0.82079822  | C | -3.08400046 | -0.80889513 | 0.51766356  |
| C  | -0.24144258 | 3.37902351  | -0.51011248 | C | -4.42595339 | -1.01920474 | 0.15011010  |
| C  | 0.43205064  | 3.08094533  | -1.71435535 | C | -4.88861727 | -0.62703879 | -1.18322648 |
| C  | 0.51557740  | 4.04200756  | -2.73380768 | N | -5.12730250 | -1.60225494 | 1.19899910  |
| C  | -0.07480098 | 5.30437178  | -2.56309520 | C | -4.23686704 | -1.73616523 | 2.16420199  |
| C  | -0.75523587 | 5.60459728  | -1.37144302 | N | -2.96364553 | -1.28200861 | 1.81951965  |
| C  | -0.84303485 | 4.64755671  | -0.34853829 | H | -1.89178124 | 0.53361199  | -2.20682870 |
| H  | 0.87463547  | 2.08778465  | -1.84689857 | O | -6.04759503 | -0.74844994 | -1.61021295 |
| H  | 1.03450791  | 3.79863748  | -3.66651333 | H | -4.42580822 | -2.15940604 | 3.15204006  |
| H  | -0.01580407 | 6.05019810  | -3.36237819 | C | -1.81416101 | -1.22376799 | 2.71449796  |
| H  | -1.22961333 | 6.58247676  | -1.23982802 | H | -1.92050168 | -0.40330096 | 3.44504237  |
| H  | -1.39976160 | 4.87869399  | 0.56532265  | H | -0.90496435 | -1.03387023 | 2.11139132  |
| C  | 0.90045734  | 2.62028446  | 2.11691411  | H | -1.70679908 | -2.18098518 | 3.25174866  |
| C  | 1.26843210  | 3.96914727  | 2.30050564  |   |             |             |             |

Complex [Pt(PPh<sub>3</sub>)(dmap)(N7-9mhyp)] (method A): E = -2086.74277707 au

|    |             |             |             |   |             |            |             |
|----|-------------|-------------|-------------|---|-------------|------------|-------------|
| Pt | 0.00000000  | 0.00000000  | 0.00000000  | C | -0.06418306 | 3.41709319 | -0.33521327 |
| C  | 2.03237064  | 0.00000000  | 0.00000000  | C | 0.28395264  | 3.07883839 | -1.66024158 |
| C  | 2.93493384  | 1.08680897  | 0.00000000  | C | 0.38339741  | 4.08372939 | -2.63683152 |
| C  | 4.32635192  | 0.89064201  | -0.06782038 | C | 0.13707669  | 5.42327245 | -2.30146888 |
| C  | 4.86032688  | -0.40418351 | -0.14590812 | C | -0.23675168 | 5.76259359 | -0.98906314 |
| C  | 3.98828710  | -1.50385737 | -0.18054860 | C | -0.34925522 | 4.76470009 | -0.01027898 |
| C  | 2.59938579  | -1.30503715 | -0.10957828 | H | 0.42082506  | 2.02666108 | -1.93284913 |
| H  | 2.55985616  | 2.11442123  | 0.04292433  | H | 0.63283945  | 3.80681856 | -3.66551570 |
| H  | 4.99380966  | 1.75979654  | -0.06423145 | H | 0.21254673  | 6.20338447 | -3.06628227 |
| H  | 5.94312576  | -0.55735257 | -0.20064850 | H | -0.45689392 | 6.80359853 | -0.73018147 |
| H  | 4.38949919  | -2.52082209 | -0.27317662 | H | -0.68838110 | 5.03144734 | 0.99635374  |
| C  | 1.62171334  | -2.45124446 | -0.18046748 | C | 0.94834868  | 2.39501282 | 2.29998662  |
| H  | 1.30751538  | -2.77851827 | 0.82832180  | C | 1.51797372  | 3.65796832 | 2.55921988  |
| H  | 2.03280307  | -3.33400404 | -0.71236304 | C | 2.37251496  | 3.83460154 | 3.65986212  |
| N  | 0.37681500  | -1.97413324 | -0.88311666 | C | 2.65826183  | 2.75878473 | 4.51512103  |
| C  | 0.63934336  | -1.80127952 | -2.34995109 | C | 2.09890208  | 1.49613882 | 4.25900568  |
| H  | 0.77747022  | -2.79633249 | -2.81786207 | C | 1.25695670  | 1.31160588 | 3.15213483  |
| H  | 1.55334723  | -1.20479940 | -2.47745760 | H | 1.31493919  | 4.50144345 | 1.89359008  |
| H  | -0.20142750 | -1.25269170 | -2.80521486 | H | 2.81882327  | 4.81739837 | 3.84433875  |
| C  | -0.72123693 | -2.95901639 | -0.70113138 | H | 3.32542258  | 2.90068754 | 5.37166522  |
| H  | -1.61278374 | -2.61405542 | -1.24325083 | H | 2.33241375  | 0.64766762 | 4.91052768  |
| H  | -0.95971668 | -3.05290751 | 0.36899024  | H | 0.85580530  | 0.31913548 | 2.91665763  |
| H  | -0.41097668 | -3.94517683 | -1.09940785 | C | -1.88622824 | 2.42783021 | 1.66591957  |
| P  | -0.22990374 | 2.06934871  | 0.91038754  | C | -2.97092957 | 2.73370986 | 0.81314734  |

|   |             |             |             |
|---|-------------|-------------|-------------|
| C | -4.24680991 | 2.96565166  | 1.34848471  |
| C | -4.45501528 | 2.89683331  | 2.73755387  |
| C | -3.38090060 | 2.59366679  | 3.58941618  |
| C | -2.10088639 | 2.35887583  | 3.05816689  |
| H | -2.82098908 | 2.78384572  | -0.26992554 |
| H | -5.07790623 | 3.20104477  | 0.67606535  |
| H | -5.44980087 | 3.08811040  | 3.15365025  |
| H | -3.53258772 | 2.54865607  | 4.67317536  |
| H | -1.26735222 | 2.13282139  | 3.73060041  |
| N | -3.72886837 | 0.37173978  | -3.41912079 |
| C | -4.94921153 | 0.09291521  | -2.94085936 |
| N | -5.33965255 | -0.28694393 | -1.68959454 |
| C | -4.26722557 | -0.35772874 | -0.87975783 |
| C | -2.93142665 | -0.09438376 | -1.21973639 |
| C | -2.61102671 | 0.28746772  | -2.58569618 |
| N | -2.13190655 | -0.27784771 | -0.09102940 |
| C | -2.95555420 | -0.64005084 | 0.89883557  |
| N | -4.25988094 | -0.70994669 | 0.47422004  |
| H | -5.77111088 | 0.18089044  | -3.66527975 |
| O | -1.43647568 | 0.51455880  | -2.98998123 |
| H | -2.65552614 | -0.83115858 | 1.92690813  |
| C | -5.44275970 | -1.03627158 | 1.26487847  |
| H | -5.32817697 | -2.01888432 | 1.75046273  |
| H | -6.29325160 | -1.06887002 | 0.56781239  |
| H | -5.62653232 | -0.26366482 | 2.02935290  |

**Table SI 2.** Natural charges and HSAB-derived global and group parameters (in au) for the reaction of *N1*, *N3* or *N7* atoms in 9-mhypH derivatives with the Pt atom in [Pt(PPh<sub>3</sub>)(dmab)]<sup>+</sup>.

|                                          | Pt      | 9-mhypH     |             | 9-mhypH·ClO <sub>4</sub> <sup>-</sup> |             | 9-mhyp <sup>-</sup> |             |             |
|------------------------------------------|---------|-------------|-------------|---------------------------------------|-------------|---------------------|-------------|-------------|
|                                          |         | <i>N3</i>   | <i>N7</i>   | <i>N3</i>                             | <i>N7</i>   | <i>N1</i>           | <i>N3</i>   | <i>N7</i>   |
| $A = E^N - E^{N+1}$ <sup>(a)</sup>       | 0.1476  | -0.0183     |             | -0.1203                               |             |                     | -0.1780     |             |
| $I = E^{N-1} - E^N$ <sup>(b)</sup>       | 0.3805  | 0.3063      |             | 0.1755                                |             |                     | 0.1185      |             |
| $\mu = -\frac{1}{2}(I+A)$                | -0.2640 | -0.1440     |             | -0.0276                               |             |                     | 0.0298      |             |
| $S = 1/(I-A)$                            | 4.2927  | 3.0802      |             | 3.3815                                |             |                     | 3.3724      |             |
| $\omega = S \cdot \mu^2$                 | 0.2993  | 0.0639      |             | 0.0026                                |             |                     | 0.0030      |             |
| $q_M^{N+1}$ <sup>(c)</sup>               | -0.2468 | -           | -           | -                                     | -           | -                   | -           | -           |
| $q_M^N$ <sup>(c)</sup>                   | 0.0696  | -0.0589     | -0.2658     | -0.1173                               | -0.3261     | -0.1753             | -0.2138     | -0.4092     |
| $q_M^{N-1}$ <sup>(c)</sup>               | -       | 0.1344      | -0.0175     | -0.0035                               | -0.1735     | 0.0296              | -0.0304     | -0.1935     |
| $f^+ = q_M^{N+1} - q_M^N$                | -0.3163 | -           | -           | -                                     | -           | -                   | -           | -           |
| $f^- = q_M^N - q_M^{N-1}$                | -       | -0.1933     | -0.2483     | -0.1137                               | -0.1527     | -0.2049             | -0.1834     | -0.2157     |
| $s_{\pm} = S \cdot f^{\pm}$              | -1.3579 | -0.5953     | -0.7648     | -0.3846                               | -0.5163     | -0.6912             | -0.6184     | -0.7273     |
| $\Delta(s^2)_{kl} = (s_{k+} - s_{l-})^2$ |         | <b>0.58</b> | <b>0.35</b> | <b>0.95</b>                           | <b>0.71</b> | <b>0.44</b>         | <b>0.55</b> | <b>0.40</b> |
| $\Delta\Omega_{kl}$                      |         | <b>3.8</b>  | <b>2.9</b>  | <b>11.4</b>                           | <b>6.7</b>  | <b>20.0</b>         | <b>29.5</b> | <b>11.5</b> |

<sup>(a)</sup> Electron affinity (au); <sup>(b)</sup> Vertical ionization potential (au); <sup>(c)</sup> Mulliken group charges (in e) after summation over all neighbouring atoms.
